# Supplementary material for: miR-103-3p targets Ndel1 to regulate neural stem cell proliferation and differentiation
Source: PubMed Central journal article supplement — Neural Regen Res. 2021 Jul 8;17(2):401–8. doi: 10.4103/1673-5374.317987 (PMC8463973; doi:10.4103/1673-5374.317987), 2021-07-08
Supplement: NRR-17-401_Suppl2.pdf [file NRR-17-401_Suppl2.pdf]

## OPEN PEER REVIEW REPORT 2

**Name of journal:** Neural Regeneration Research

**Manuscript NO:** NRR-D-20-01106

**Title:** MiR-103-3p targets Nde1 to regulate neural stem cell proliferation and differentiation via the Wnt/ $\beta$ -Catenin signaling pathway

**Reviewer's Name:** Colin Barnstable

**Reviewer's country:** USA

### COMMENTS TO AUTHORS

Control of stem cell pool dynamics is of great importance but is only beginning to be studied. Regulation of stem cell pools is essential to provide the correct number of neurons to populate specific brain areas. This study provides clear evidence for one control pathway. The data are clearly presented and appropriate controls are included.

One thing the authors should consider is giving some more background about miR-103-3p in the discussion. While they discuss some previous work, they do not refer to Zhang et al, 2019, *Int J Molec Med* who found miR-103-3p regulated apoptosis in cardiomyocytes through actions on Atg5, or to Zhou and Rigoutsos who found miR-103-3p regulates GPRC5a. This suggests that miR-103-3p might have multiple actions on genes that regulate cell growth and survival and the authors should discuss the relative importance of Nde1 in this whole group of genes.
